# Supplementary material for: Nitrogen- and sulfur-doped graphene quantum dots for chemiluminescence
Source: Royal Society of Chemistry journal article supplement (doi:10.1039/d2nr07213k), 2023-01-01
Supplement: d2nr07213k1.pdf [file d2nr07213k1.pdf]

Electronic Supplementary Information to

**Nitrogen- and sulfur-doped graphene quantum dots for  
chemiluminescence**

Xiaoli Qin,<sup>a,b,†</sup> Ziying Zhan,<sup>a,†</sup> Ruizhong Zhang,<sup>a,c,†</sup> Kenneth Chu,<sup>a</sup> Zackry Whitworth,<sup>a</sup> Zhifeng Ding<sup>a,\*</sup>

<sup>a</sup> *Department of Chemistry, Western University, London, Ontario N6A 3K7, Canada*

<sup>b</sup> *College of Chemistry and Materials Science, Hunan Agricultural University, Changsha 410128, China*

<sup>c</sup> *Tianjin Key Laboratory of Molecular Optoelectronic Sciences, Department of Chemistry, School of Science, Tianjin University, Tianjin 300072, China*

\* Corresponding author (email: [zfding@uwo.ca](mailto:zfding@uwo.ca))

† Authors equally contributed.

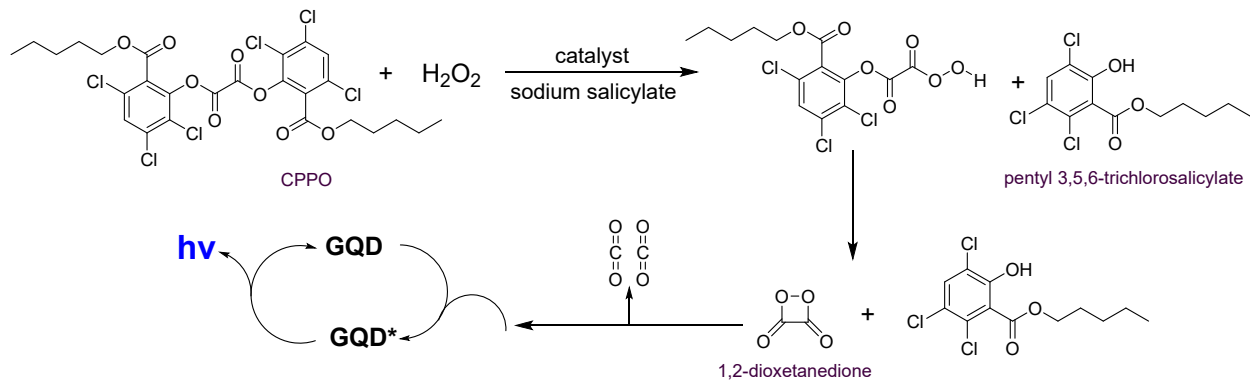

**Fig. S1.** Reaction mechanisms of the peroxyoxalate-based CL reaction with CPPO and H<sub>2</sub>O<sub>2</sub> reagents.

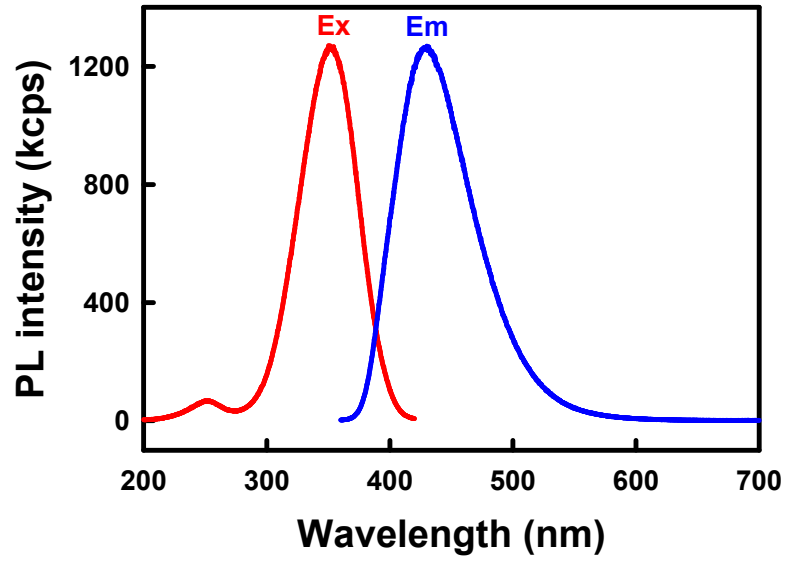

**Fig. S2.** PL excitation (red) and emission (blue) spectra of 0.02 mg mL<sup>-1</sup> NS-GQDs in aqueous solution,  $\lambda_{em} = 430$  nm for excitation detection and  $\lambda_{ex} = 350$  nm for emission excitation.

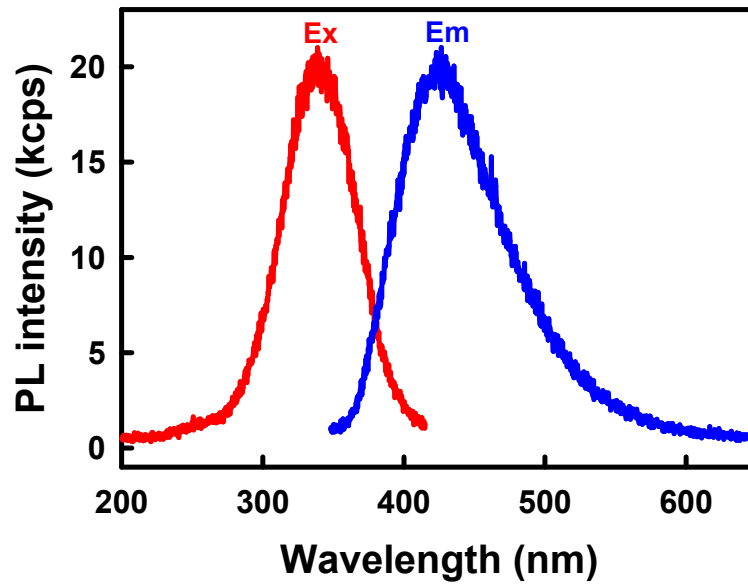

**Fig. S3.** PL excitation (red) and emission (blue) spectra of 0.02 mg mL<sup>-1</sup> N-GQDs aqueous solution,  $\lambda_{em} = 425$  nm for excitation detection and  $\lambda_{ex} = 338$  nm for emission excitation.

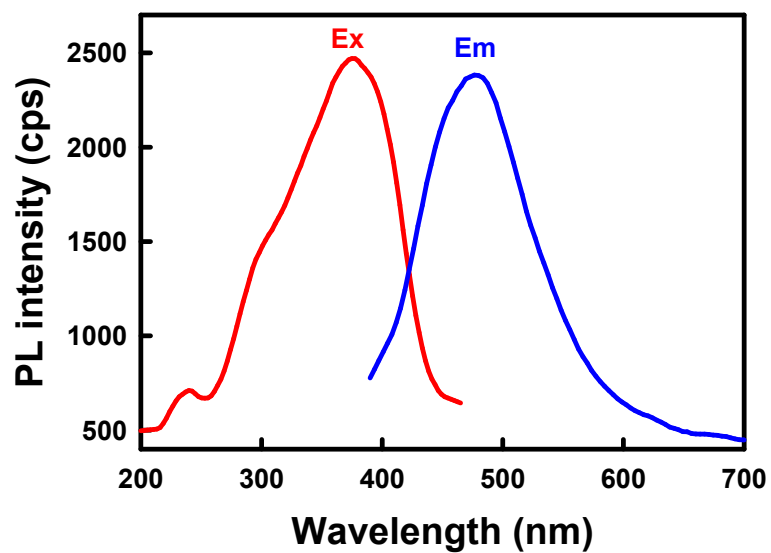

**Fig. S4.** PL excitation (red) and emission (blue) spectra of 0.02 mg mL<sup>-1</sup> GQDs in aqueous solution,  $\lambda_{em} = 478$  nm for excitation detection and  $\lambda_{ex} = 375$  nm for emission excitation.

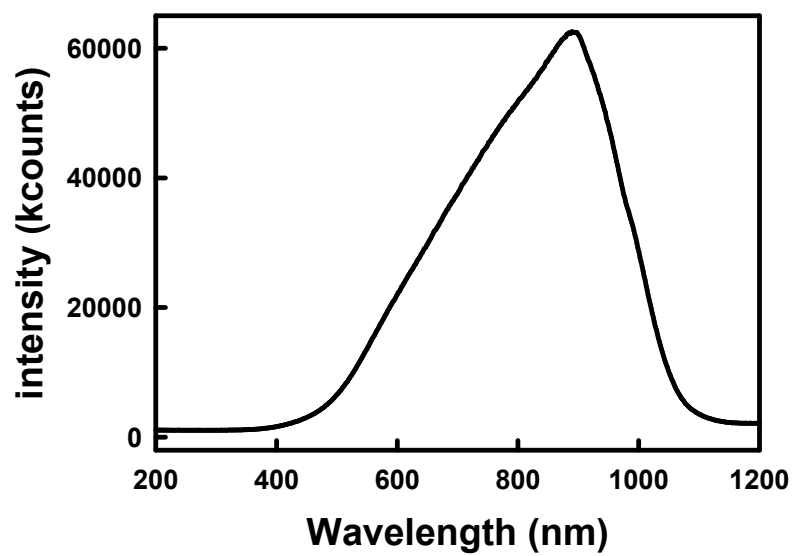

**Fig. S5.** Accumulated spectrum of the calibration lamp for 5 s, acquired on the spectrograph and CCD camera set.

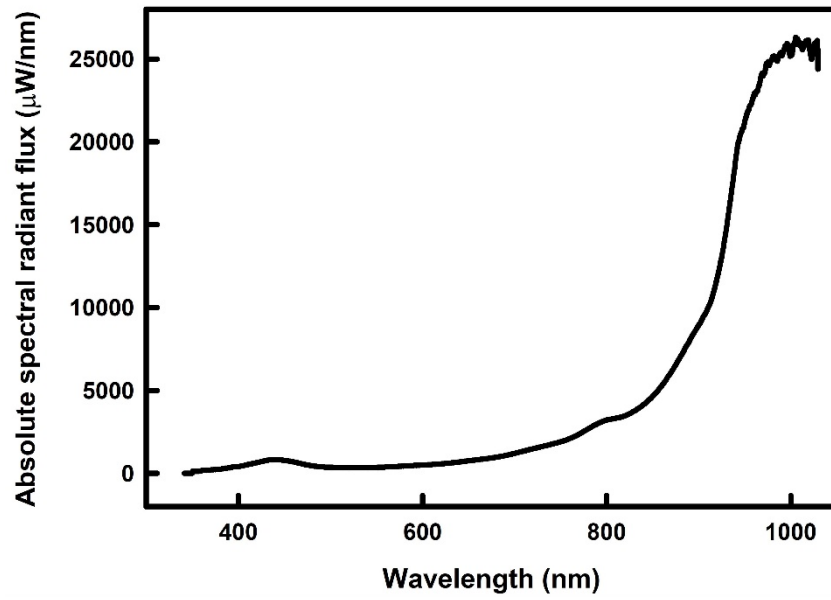

**Fig. S6.** Accumulated absolute irradiance flux spectrum of the calibration lamp for 5 s, taken on the calibrated Ocean Insight USB2000+ spectrometer.

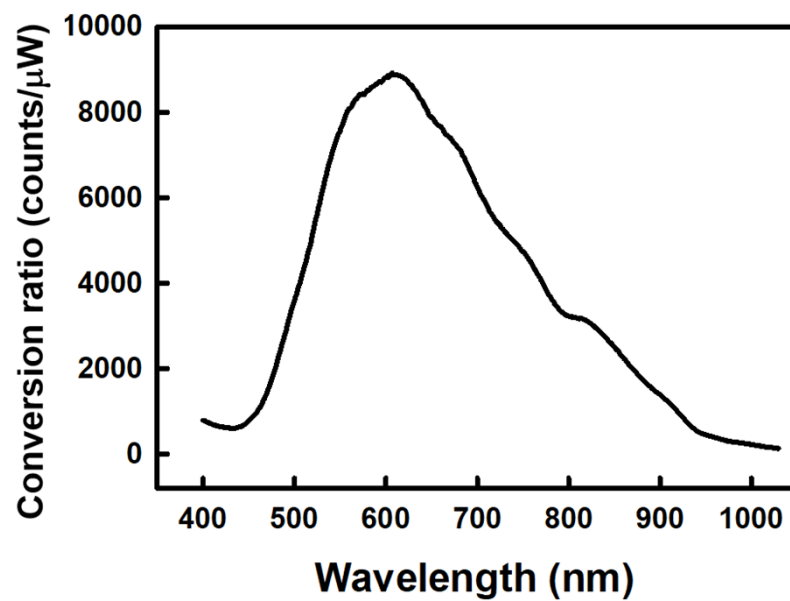

**Fig. S7.** The conversion curve of the counts per  $\mu$ W as a function of the wavelength, by taking the ratio of the standard lamp spectrum measured with the spectrograph and CCD camera set (Fig. S5) to the lamp irradiance spectrum taken on the calibrated Ocean Insight USB2000+ spectrometer.
